# Supplementary material
Source: publisher site journal article supplement (https://www.dovepress.com/article/530446)
Supplement: Supplementary file 1 [file 530446%20Supplementary%20Material.docx]

**Table S1. Information of 136 NETs-related genes used in this study.**

| **Gene symbol** | **Entrez Gene** | **Ensembl** | **Description** |
| --- | --- | --- | --- |
| Actb | 60 | ENSG00000075624 | Actin beta |
| Actg1 | 71 | ENSG00000184009 | Actin gamma 1 |
| Actn1 | 87 | ENSG00000072110 | Actinin alpha 1 |
| Actn4 | 81 | ENSG00000130402 | Actinin alpha 4 |
| Akt1 | 207 | ENSG00000142208 | AKT serine/threonine kinase 1 |
| Akt2 | 208 | ENSG00000105221 | AKT serine/threonine kinase 2 |
| Arpin | 348110 | ENSG00000242498 | Actin related protein 2/3 complex inhibitor |
| Atg7 | 10533 | ENSG00000197548 | Autophagy related 7 |
| Azu1 | 566 | ENSG00000172232 | Azurocidin 1 |
| C3 | 718 | ENSG00000125730 | Complement C3 |
| C3Ar1 | 719 | ENSG00000171860 | Complement C3a receptor 1 |
| C5Ar1 | 728 | ENSG00000197405 | Complement C5a receptor 1 |
| Camp | 820 | ENSG00000164047 | Cathelicidin antimicrobial peptide |
| Card11 | 84433 | ENSG00000198286 | Caspase recruitment domain family member 11 |
| Casp1 | 834 | ENSG00000137752 | Caspase 1 |
| Cat | 847 | ENSG00000121691 | Catalase |
| Ccdc25 | 55246 | ENSG00000147419 | Coiled-coil domain containing 25 |
| Ccl2 | 6347 | ENSG00000108691 | C-C motif chemokine ligand 2 |
| Ccl3 | 6348 | ENSG00000277632 | C-C motif chemokine ligand 3 |
| Ccl4 | 6351 | ENSG00000275302 | C-C motif chemokine ligand 4 |
| Ccl5 | 6352 | ENSG00000271503 | C-C motif chemokine ligand 5 |
| Cd177 | 57126 | ENSG00000204936 | CD177 molecule |
| Cd274 | 29126 | ENSG00000120217 | Programmed cell death 1 ligand 1 |
| Cd44 | 960 | ENSG00000026508 | CD44 molecule (Indian blood group) |
| Cebpb | 1051 | ENSG00000172216 | CCAAT enhancer binding protein beta |
| Cftr | 1080 | ENSG00000001626 | ATP-binding cassette sub-family C, member 7 |
| Clec4E | 26253 | ENSG00000166523 | Macrophage-inducible C-type lectin |
| Clec6A | 93978 | ENSG00000205846 | Dectin-2 |
| Clec7A | 64581 | ENSG00000172243 | Dectin-1 |
| Csf3 | 1440 | ENSG00000108342 | Granulocyte colony stimulating factor |
| Ctsc | 1075 | ENSG00000109861 | Cathepsin C |
| Ctsg | 1511 | ENSG00000100448 | Cathepsin G |
| Cxcl1 | 2919 | ENSG00000163739 | C-X-C motif chemokine ligand 1 |
| Cxcl2 | 2920 | ENSG00000081041 | C-X-C motif chemokine ligand 2 |
| Cxcr4 | 7852 | ENSG00000121966 | C-X-C motif chemokine receptor 4 |
| Cybb | 1536 | ENSG00000165168 | NADPH oxidase |
| Defa3 | 1668 | ENSG00000239839 | Defensin alpha 3 |
| Dnajb1 | 3337 | ENSG00000132002 | DnaJ heat shock protein family (Hsp40) member B1 |
| Dnase1 | 1773 | ENSG00000213938 | Deoxyribonuclease I |
| Elane | 1991 | ENSG00000197561 | Neutrophil elastase |
| Eno1 | 2023 | ENSG00000074800 | Enolase 1 |
| Entpd4 | 14573 | ENSG00000197217 | Ectonucleoside Triphosphate Diphosphohydrolase 4 |
| F2Rl2 | 2151 | ENSG00000164220 | Proteinase-activated receptor-3 |
| F3 | 2152 | ENSG00000117525 | Coagulation Factor III, tissue factor |
| Fcar | 2204 | ENSG00000186431 | Fc fragment of IgA receptor |
| Fcgr2B | 2213 | ENSG00000072694 | Fc gamma receptor IIb |
| Fgl2 | 10875 | ENSG00000127951 | Fibrinogen like 2 |
| Gpbar1 | 151306 | ENSG00000179921 | G protein-coupled bile acid receptor 1 |
| Gsdmd | 79792 | ENSG00000104518 | Gasdermin D |
| H2Ax | 3014 | ENSG00000188486 | H2A histone family, member X |
| Hif1A | 3091 | ENSG00000100644 | Hypoxia inducible factor 1 subunit alpha |
| Hmgb1 | 3146 | ENSG00000189403 | High mobility group box 1 |
| Hrg | 3273 | ENSG00000113905 | Histidine rich glycoprotein |
| Il12A | 3592 | ENSG00000168811 | Interleukin 12A |
| Il17A | 3605 | ENSG00000112115 | Interleukin 17 |
| Il1B | 3553 | ENSG00000125538 | Interleukin 1 beta |
| Il1Rl1 | 9173 | ENSG00000115602 | Interleukin 1 receptor like 1 |
| Il33 | 90865 | ENSG00000137033 | Interleukin 33 |
| Il36Rn | 26525 | ENSG00000136695 | Interleukin 36 receptor antagonist |
| Il5 | 3567 | ENSG00000113525 | Interleukin 5 |
| Il6 | 3569 | ENSG00000136244 | Interleukin 6 |
| Il8 | 3576 | ENSG00000169429 | Interleukin 8 |
| Ilk | 3611 | ENSG00000166333 | Integrin linked kinase |
| Irak4 | 51135 | ENSG00000198001 | Interleukin 1 receptor associated kinase 4 |
| Irf1 | 3659 | ENSG00000125347 | Interferon regulatory factor 1 |
| Itgam | 3684 | ENSG00000169896 | Complement component 3 receptor 3 subunit |
| Itgb1 | 3688 | ENSG00000150093 | Integrin subunit beta 1 |
| Itgb2 | 3689 | ENSG00000160255 | Complement component 3 receptor 3 and 4 subunit |
| Kcnn3 | 3782 | ENSG00000143603 | Potassium channel, calcium activated |
| Klf2 | 10365 | ENSG00000127528 | KLF transcription factor 2 |
| Krt10 | 3858 | ENSG00000186395 | Keratin 10 |
| Lcp1 | 3936 | ENSG00000136167 | Lymphocyte cytosolic protein 1 |
| Ldlr | 3949 | ENSG00000130164 | Low density lipoprotein receptor |
| Lpar3 | 23566 | ENSG00000171517 | Lysophosphatidic acid receptor 3 |
| Ltf | 4057 | ENSG00000012223 | Lactotransferrin |
| Lyz | 4069 | ENSG00000090382 | Lysozyme |
| Mapk1 | 5594 | ENSG00000100030 | Mitogen-activated protein kinase 1 |
| Mapk14 | 1432 | ENSG00000112062 | Mitogen-activated protein kinase 14 |
| Mapk3 | 5595 | ENSG00000102882 | Mitogen-activated protein kinase 3 |
| Mapk7 | 5598 | ENSG00000166484 | Mitogen-activated protein kinase 7 |
| Mcoln3 | 55283 | ENSG00000055732 | Mucolipin TRP cation channel 3 |
| Mfn1 | 55669 | ENSG00000171109 | Mitofusin 1 |
| Mfn2 | 9927 | ENSG00000116688 | Mitofusin 2 |
| Mir146A | 406938 | ENSG00000283733 | MicroRNA 146a |
| Mir21 | 406991 | ENSG00000284190 | MicroRNA 21 |
| Mir223 | 407008 | ENSG00000284567 | MicroRNA 223 |
| Mmp9 | 4218 | ENSG00000100985 | Matrix metallopeptidase 9 |
| Mnda | 4332 | ENSG00000163563 | Myeloid cell nuclear differentiation antigen |
| Mpo | 4353 | ENSG00000005381 | Myeloperoxidase |
| Mtor | 2475 | ENSG00000198793 | Mechanistic target of rapamycin kinase |
| Myd88 | 4615 | ENSG00000172936 | MYD88 innate immune signal transduction adaptor |
| Myh9 | 4627 | ENSG00000100345 | Myosin heavy chain 9 |
| Nfe2L2 | 4780 | ENSG00000116044 | NFE2 like bZIP transcription factor 2 |
| Nfil3 | 4783 | ENSG00000165030 | Nuclear factor, interleukin 3 regulated |
| Nfkbia | 4792 | ENSG00000100906 | NFKB inhibitor alpha |
| Nlrp3 | 114548 | ENSG00000162711 | NLR family pyrin domain containing 3 |
| Nox4 | 50507 | ENSG00000086991 | NADPH oxidase 4 |
| Opa1 | 4976 | ENSG00000198836 | OPA1 mitochondrial dynamin like GTPase |
| Orai1 | 84876 | ENSG00000276045 | ORAI calcium release-activated calcium modulator 1 |
| P2Rx1 | 5023 | ENSG00000108405 | Purinergic receptor P2X 1 |
| Padi4 | 23569 | ENSG00000159339 | Peptidyl arginine deiminase 4 |
| Parvb | 29780 | ENSG00000188677 | Parvin beta |
| Pf4 | 5196 | ENSG00000163737 | Chemokine (C-X-C motif) ligand 4 |
| Pik3Ca | 5290 | ENSG00000121879 | Phosphatidylinositol-4,5-bisphosphate 3-kinase |
| Pkm | 5315 | ENSG00000067225 | Pyruvate kinase M1/2 |
| Procr | 10544 | ENSG00000101000 | Protein C receptor |
| Prtn3 | 5657 | ENSG00000196415 | Proteinase 3 |
| Ptafr | 5724 | ENSG00000169403 | Platelet activation factor receptor |
| Ripk1 | 8737 | ENSG00000137275 | Receptor interacting serine/threonine kinase 1 |
| Ripk3 | 11035 | ENSG00000129465 | Receptor interacting serine/threonine kinase 3 |
| S100A12 | 6283 | ENSG00000163221 | S100 calcium binding protein 2 |
| S100A8 | 6279 | ENSG00000143546 | S100 calcium binding protein A8 |
| S100A9 | 6280 | ENSG00000163220 | S100 calcium binding protein A9 |
| S1Pr2 | 9294 | ENSG00000267534 | Sphingosine-1-phosphate receptor 2 |
| Selp | 6403 | ENSG00000174175 | P-selectin |
| Selplg | 6404 | ENSG00000110876 | P-selectin receptor |
| Sgk1 | 6446 | ENSG00000118515 | Serum/glucocorticoid regulated kinase 1 |
| Siglec14 | 10049587 | ENSG00000254415 | Sialic acid binding Ig like lectin 4 |
| Socs3 | 9021 | ENSG00000184557 | Suppressor of cytokine signaling 3 |
| Spp1 | 6696 | ENSG00000118785 | Secreted phosphoprotein 1 |
| Src | 6714 | ENSG00000197122 | SRC proto-oncogene, non-receptor tyrosine kinase |
| Stat3 | 6774 | ENSG00000168610 | Signal transducer and activator of transcription 3 |
| Sucnr1 | 56670 | ENSG00000198829 | Succinate receptor 1 |
| Syk | 6850 | ENSG00000165025 | Spleen associated tyrosine kinase |
| Ticam1 | 148022 | ENSG00000127666 | TIR domain-containing adaptor-inducing interferon-beta |
| Timp1 | 7076 | ENSG00000102265 | TIMP metallopeptidase inhibitor 1 |
| Tkt | 7086 | ENSG00000163931 | Transketolase |
| Tlr2 | 7097 | ENSG00000137462 | Toll like receptor 2 |
| Tlr4 | 7099 | ENSG00000136869 | Toll like receptor 4 |
| Tlr7 | 51284 | ENSG00000196664 | Toll like receptor 7 |
| Tlr8 | 51311 | ENSG00000101916 | Toll like receptor 8 |
| Tlr9 | 54106 | ENSG00000239732 | Toll like receptor 9 |
| Tnf | 7124 | ENSG00000232810 | Tumor necrosis factor-alpha |
| Tnfaip3 | 7128 | ENSG00000118503 | TNF alpha induced protein 3 |
| Wasl | 8976 | ENSG00000106299 | WASP like actin nucleation promoting factor |
| Xist | 7503 | ENSG00000229807 | X inactive specific transcript |

**Table S2. Primers of qPCR used in this study**

| **Gene** | **Primers Forward (5’–3’)** | **Product size (bp)** |
| --- | --- | --- |
| Casp1 | Forward: AGAGGATTTCTTAACGGATGCA | 22 |
|  | Reverse: TCACAAGACCAGGCATATTCTT | 22 |
| Tlr2 | Forward: TTTCTACTTTACCCAGCTCGCTCA | 24 |
|  | Reverse: GGAACTGTCGGAGGTAGAGTTCG | 23 |
| Tlr4 | Forward: AAACTTGCCTTCAAAACCTGGC | 22 |
|  | Reverse: ACCTGAACTCATCAATGGTCACATC | 25 |
| Ccl3 | Forward: GTGGAATCTTCCGGCTGTAG | 20 |
|  | Reverse: ACCATGACACTCTGCAACCA | 20 |
| Fcgr2b | Forward: AATCCTGCCGTTCCTACTGATC | 22 |
|  | Reverse: GTGTCACCGTGTCTTCCTTGAG | 22 |
| Itgam | Forward: CAGATCAACAATGTGACCGTATGGG | 25 |
|  | Reverse: CATCATGTCCTTGTACTGCCGCTTG | 25 |
| Itgb2 | Forward: TGCAGTAATGGAGCATCGAG | 20 |
|  | Reverse: TCGGAAGCCATGACCTTTAC | 20 |
| Gapdh | Forward: GGTTGTCTCCTGCGACTTCA | 20 |
|  | Reverse: TGGTCCAGGGTTTCTTACTCC | 21 |

**Figure S1. Original uncropped image from the MPO protein band.**

**
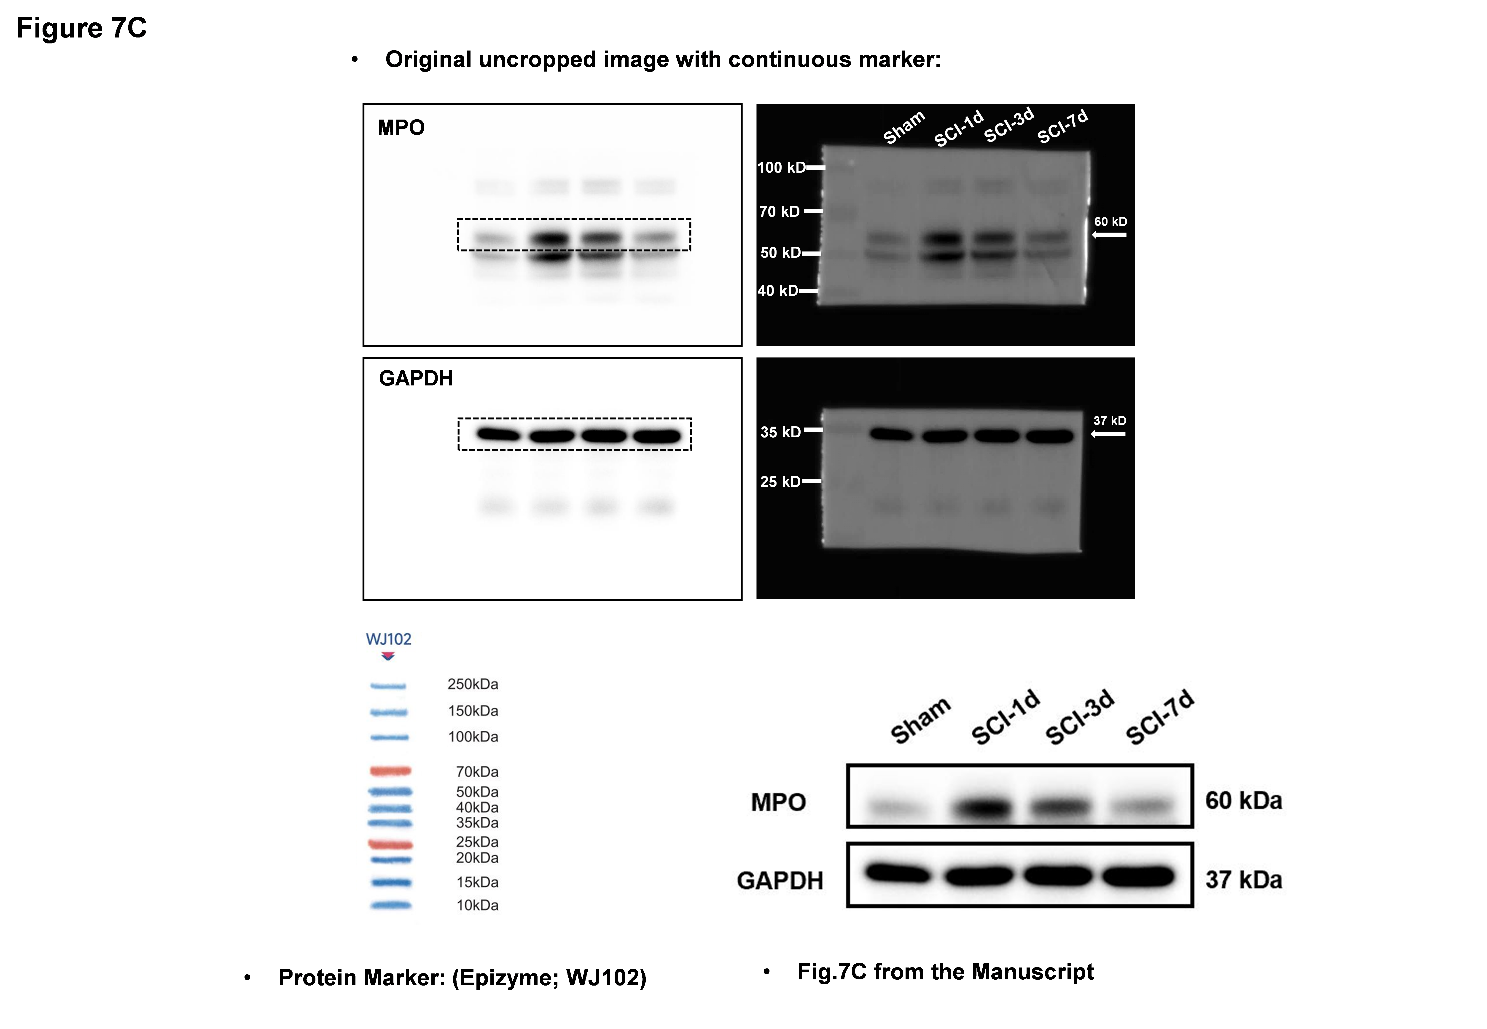
**

**Figure S2. Original uncropped image from the CitH3 protein band.**

**
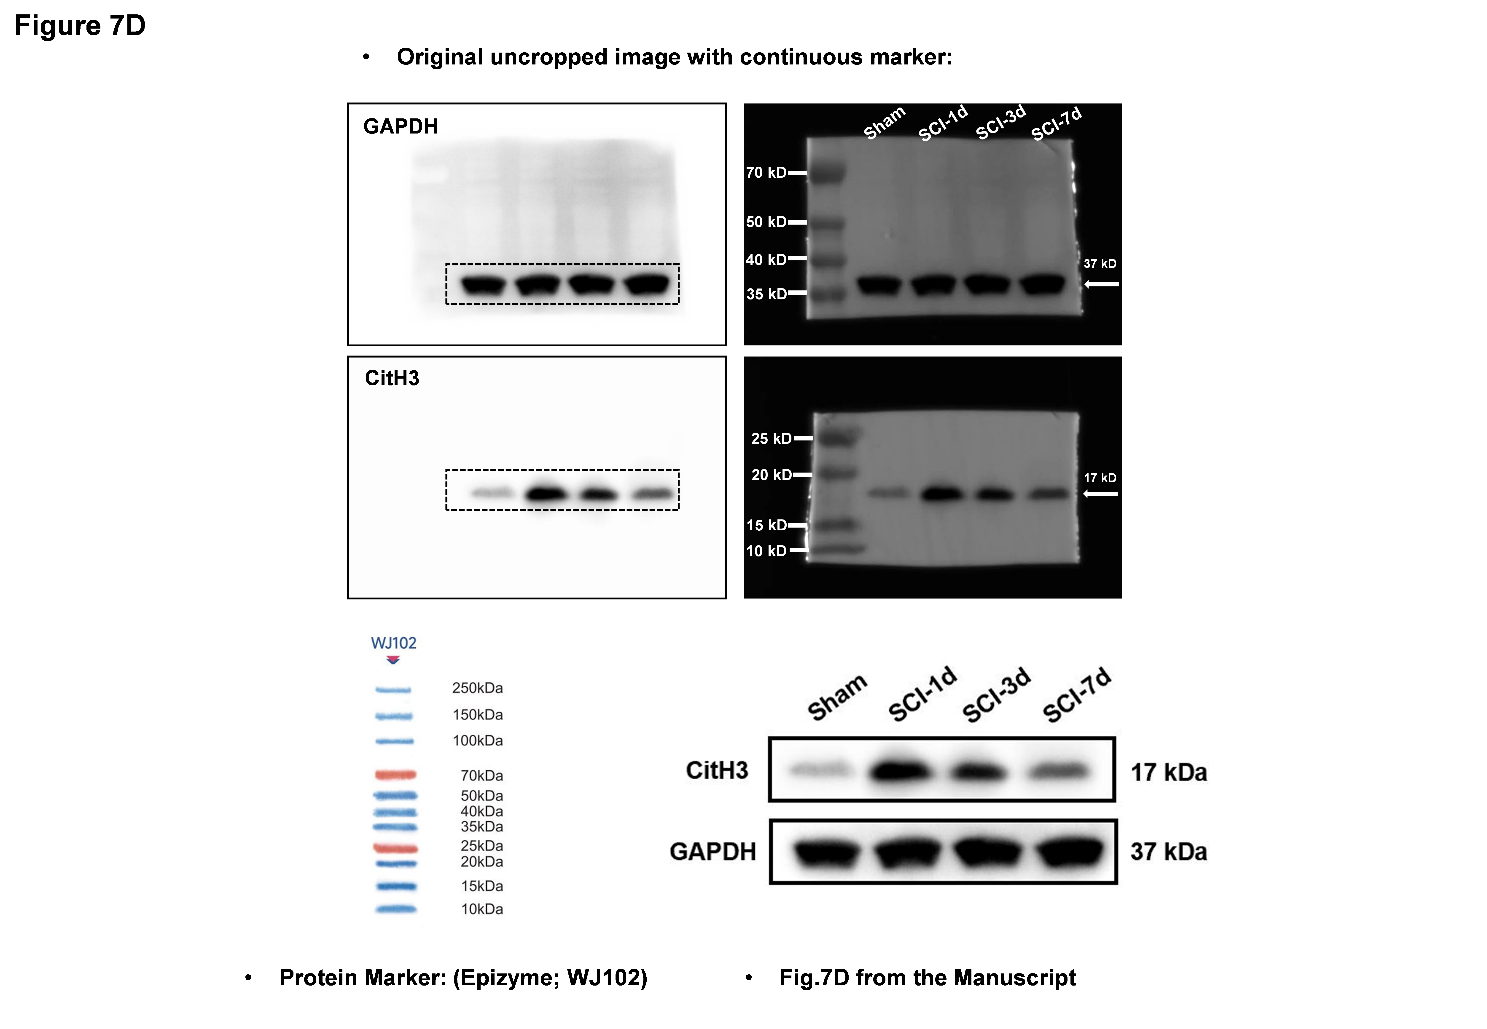
**
